# Supplementary material
Source: Springer Nature journal article supplement (https://www.springermedizin.de/resource/supplementary/12911_2013_883_MOESM5_ESM.pdf/9526640)
Supplement: MOESM5 [file 9526640]

Disease category

Digestive system diseases 

Liver diseases 

Hepatic insufficiency 

*Liver failure* 

***Hepatic encephalopathy*** 

Nervous system diseases 

Central nervous system diseases 

*Brain diseases* 

Brain diseases, metabolic 

***Hepatic encephalopathy*** 

Nutritional and metabolic diseases

Metabolic diseases 

Brain diseases, metabolic 

***Hepatic encephalopathy*** 

Distance = 3

Distance = 2

Distance = 2
